# Supplementary material for: Platelet Munc13-4 regulates hemostasis, thrombosis and airway inflammation
Source: PubMed Central journal article supplement — Haematologica. 2018 Apr 19;103(7):1235–44. doi: 10.3324/haematol.2017.185637 (PMC6029531; doi:10.3324/haematol.2017.185637), 2018-07
Supplement: 2017_185637-Disclosures_and_Contributions.pdf [file 2017_185637-Disclosures_and_Contributions.pdf]

Haematologica  
HAEMATOL/2017/185637  
Version 3

Platelet Munc13-4 regulates hemostasis, thrombosis and airway  
inflammation

Eduardo I Cardenas, Keegan Breaux, Qi Da, Jose R Flores, Marco A  
Ramos, Michael J Tuvim, Alan R Burns, Rolando E Rumbaut, and  
Roberto Adachi

Disclosures: None.

Contributions: Study concept (RA). Expression studies (EIC and MAR). Secretion, activation and aggregation assays (EIC and KB). Electron microscopy and stereology (ARB and EIC). Flow chamber experiments (QD, EIC and RR). Bleeding assays (EIC and MJT). Thrombosis model (RR). Asthma model (JRF and EIC). Data analysis and manuscript preparation (RA and EIC). All authors contributed to the discussion of the study.
